# Supplementary material
Source: publisher site journal article supplement (https://www.e-cmh.org/upload/media/cmh-2023-0057-Supplementary-Table-8.pdf)
Supplement: Supplementary file 1 [file cmh-2023-0057-Supplementary-Table-8.pdf]

**Supplementary Table 8.** Baseline characteristics of the resolved- and never-HBV groups before and after IPTW

| Variables                | Before IPTW                   |                            | P-value | After IPTW                    |                            | P-value |
|--------------------------|-------------------------------|----------------------------|---------|-------------------------------|----------------------------|---------|
|                          | Resolved-HBV group<br>(n=296) | Never-HBV group<br>(n=550) |         | Resolved-HBV Group<br>(n=296) | Never-HBV group<br>(n=550) |         |
| Age (yr)                 | 66.0 (58.0–74.0)              | 61.0 (49.0–70.0)           | <0.001  | 66.0 (58.0–74.0)              | 65.0 (57.0–73.0)           | 0.02    |
| Sex                      |                               |                            | 0.45    |                               |                            | 0.91    |
| Female                   | 122 (41.2)                    | 245 (44.5)                 |         | 122 (41.2)                    | 269 (41.6)                 |         |
| Male                     | 174 (58.8)                    | 305 (55.5)                 |         | 174 (58.8)                    | 321 (58.4)                 |         |
| Ann Arbor classification |                               |                            | 0.13    |                               |                            | 0.98    |
| Stage I                  | 45 (15.2)                     | 88 (16.0)                  |         | 45 (15.2)                     | 50 (14.4)                  |         |
| Stage II                 | 69 (23.3)                     | 165 (30.0)                 |         | 69 (23.3)                     | 89 (24.4)                  |         |
| Stage III                | 35 (11.8)                     | 65 (11.8)                  |         | 35 (11.8)                     | 43 (12.1)                  |         |
| Stage IV                 | 147 (49.7)                    | 232 (42.2)                 |         | 147 (49.7)                    | 144 (49.1)                 |         |
| Extranodal involvement   |                               |                            | 0.85    |                               |                            | 0.92    |
| Present                  | 212 (71.6)                    | 389 (70.7)                 |         | 212 (71.6)                    | 392 (71.3)                 |         |
| Absent                   | 84 (28.4)                     | 161 (29.3)                 |         | 84 (28.4)                     | 158 (28.7)                 |         |
| BM involvement           |                               |                            | 0.20    |                               |                            | 0.95    |
| Present                  | 48 (16.2)                     | 87 (15.8)                  |         | 48 (16.2)                     | 92 (16.7)                  |         |
| Absent                   | 220 (74.3)                    | 429 (78.0)                 |         | 220 (74.3)                    | 410 (74.5)                 |         |
| Unknown                  | 28 (9.5)                      | 34 (6.2)                   |         | 28 (9.5)                      | 48 (8.8)                   |         |
| Subtype of DLBCL         |                               |                            | 0.63    |                               |                            | 0.98    |
| GCB                      | 103 (34.8)                    | 208 (37.8)                 |         | 103 (34.8)                    | 192 (34.9)                 |         |
| Non-GCB                  | 177 (59.8)                    | 310 (56.4)                 |         | 177 (59.8)                    | 330 (60.1)                 |         |
| Unknown                  | 16 (5.4)                      | 32 (5.8)                   |         | 16 (5.4)                      | 28 (5.0)                   |         |
| LDH                      |                               |                            | 0.12    |                               |                            | 0.96    |
| Elevated (>225 IU/L)     | 151 (51.0)                    | 248 (45.1)                 |         | 151 (51.0)                    | 282 (51.2)                 |         |
| Normal (≤225 IU/L)       | 145 (49.0)                    | 302 (54.9)                 |         | 145 (49.0)                    | 268 (48.8)                 |         |
| Underlying liver status  |                               |                            | 0.003   |                               |                            | 0.70    |
| No cirrhosis             | 270 (91.2)                    | 530 (96.4)                 |         | 270 (91.2)                    | 507 (92.2)                 |         |
| Cirrhosis                | 26 (8.8)                      | 20 (3.6)                   |         | 26 (8.8)                      | 43 (7.8)                   |         |
| IPI risk                 |                               |                            | <0.001  |                               |                            | 0.99    |
| Low                      | 133 (44.9)                    | 341 (62.0)                 |         | 133 (44.9)                    | 251 (45.7)                 |         |
| Low-intermediate         | 97 (32.8)                     | 134 (24.4)                 |         | 97 (32.8)                     | 175 (31.8)                 |         |
| High-intermediate        | 63 (21.3)                     | 72 (13.1)                  |         | 63 (21.3)                     | 118 (21.4)                 |         |
| High                     | 3 (1.0)                       | 3 (0.5)                    |         | 3 (1.0)                       | 6 (1.0)                    |         |

Continuous variables are presented as the median (interquartile range) and categorical variables are expressed as number (%). BM, bone marrow; DLBCL, diffuse large B-cell lymphoma; GCB, germinal center B cell; HBV, hepatitis B virus; IPI, International Prognostic Index; IPTW, inverse probability of treatment weighting; LDH, lactate dehydrogenase.
